# Supplementary material for: A plasmonic AgNP decorated heterostructure substrate for synergetic surface-enhanced Raman scattering identification and quantification of pesticide residues in real samples
Source: Royal Society of Chemistry journal article supplement (doi:10.1039/d2ay01068b), 2022-01-01
Supplement: d2ay01068b1.pdf [file d2ay01068b1.pdf]

# **Plasmonic AgNPs decorated heterostructure substrate for synergetic surface-enhanced Raman scattering identification and quantification of pesticide residues on real samples**

Xueting Li,<sup>a</sup> Chenyue Xu,<sup>a</sup> Lan Yan,<sup>a</sup> Yating Feng,<sup>a</sup> Haoyue Li,<sup>a</sup> Cheng Ye,<sup>a</sup> Maofeng Zhang,<sup>\*a</sup>  
Youju Huang,<sup>\*c</sup> Changlong Jiang,<sup>\*d</sup> Jianhua Li,<sup>e</sup> Yucheng Wu<sup>b\*</sup>

<sup>a</sup> School of Chemistry and Chemical Engineering, Hefei University of Technology, 193 Tunxi Road, Hefei, 230009, China

<sup>b</sup> School of Materials Science and Engineering, Hefei University of Technology, 193 Tunxi Road, Hefei, 230009, China

<sup>c</sup> College of Materials, Chemistry and Chemical Engineering, Hangzhou Normal University, Hangzhou 311121, China

<sup>d</sup> Institute of Solid State Physics, Hefei Institutes of Physical Science, Chinese Academy of Sciences, Hefei, Anhui, 230031, China

<sup>e</sup> Anhui Topway Testing Services Co. Ltd., 18 Rixin Road, Xuancheng Economic and Technological Development Zone, 242000, China

\*Corresponding Authors E-mail: mfzhang@hfut.edu.cn , yjhuang@hznu.edu.cn, cljiang@iim.ac.cn

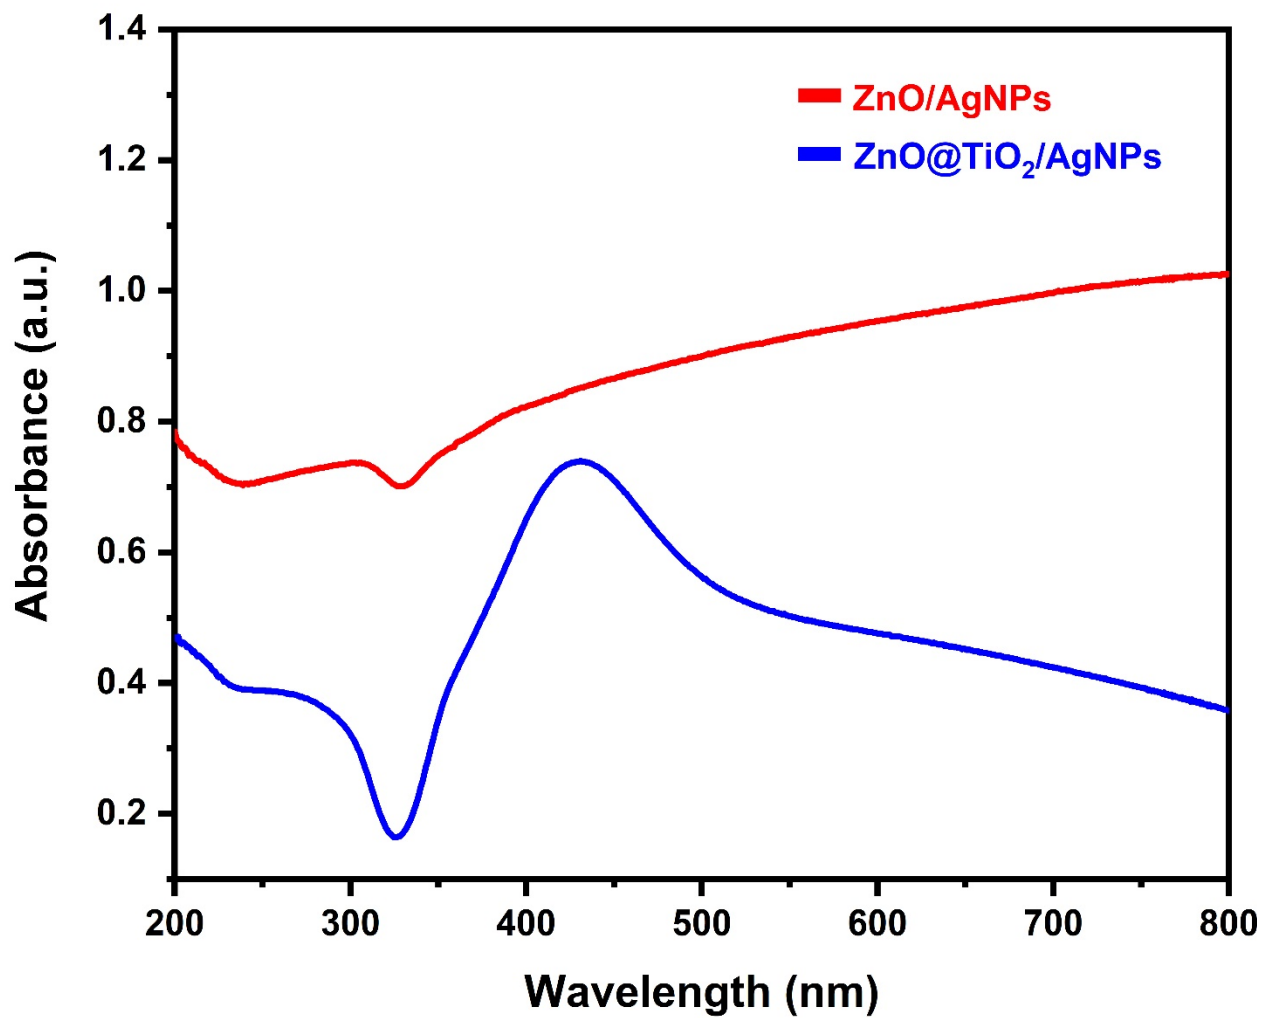

**Fig. S1.** Ultraviolet absorption spectra of ZnO/AgNPs and ZnO@TiO<sub>2</sub>/AgNPs.

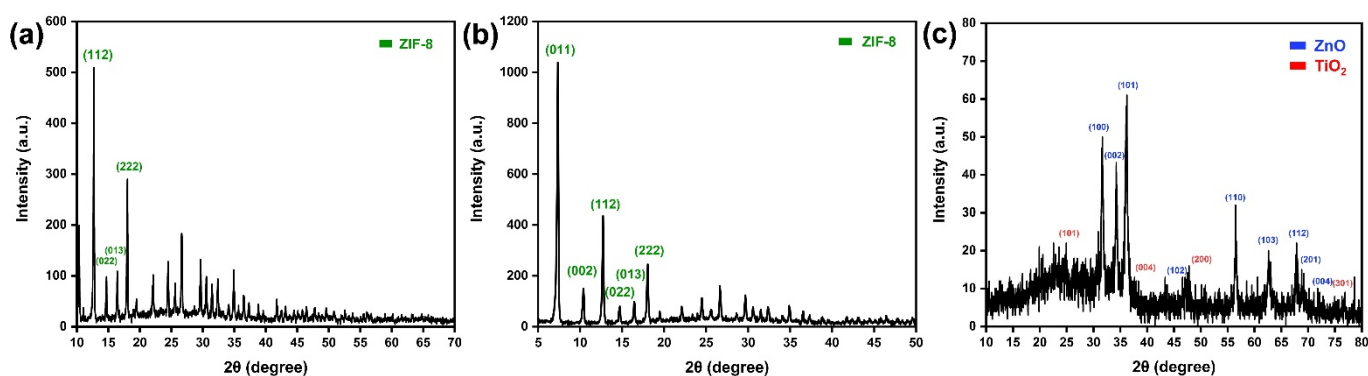

**Fig. S2.** XRD patterns of different samples: (a) ZIF-8; (b) ZIF-8@TiO<sub>2</sub>; (c) ZnO@TiO<sub>2</sub>.

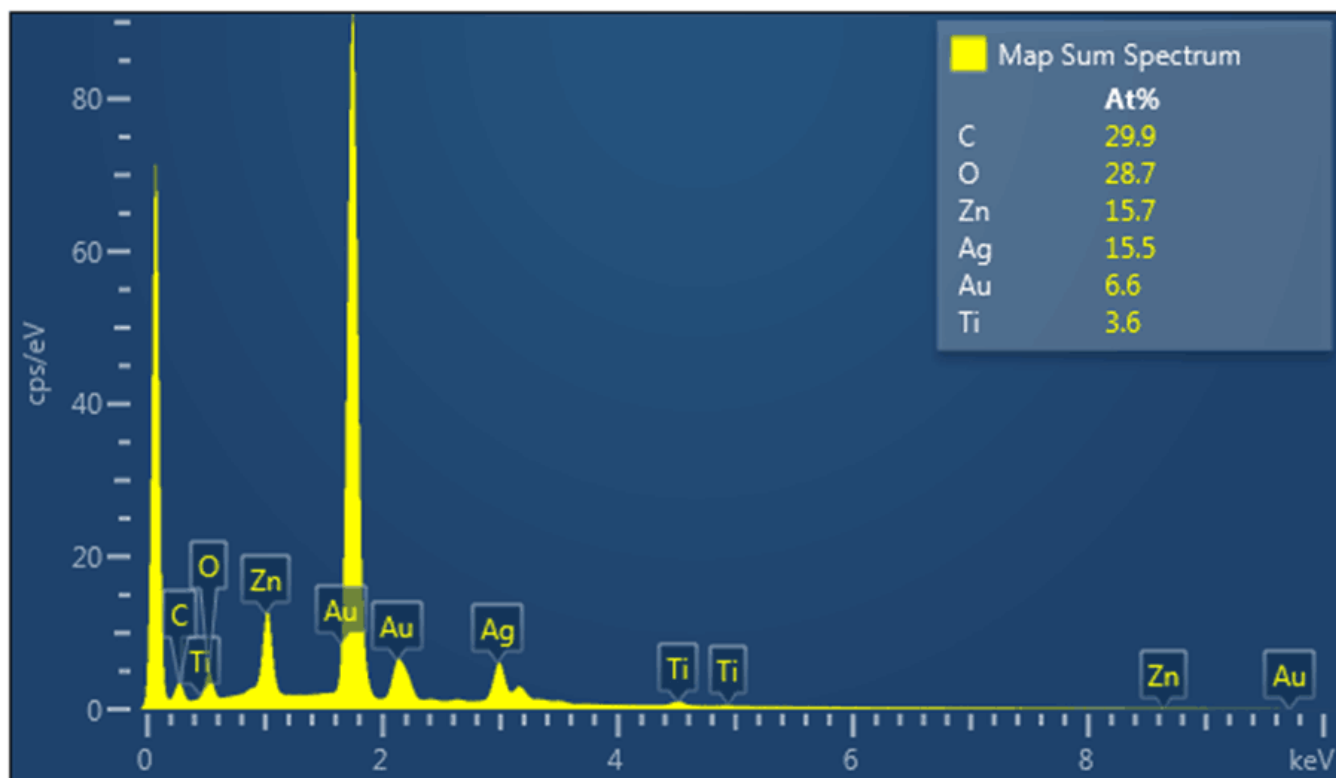

**Fig. S3.** EDS spectrum of ZnO@TiO<sub>2</sub>/AgNPs sample.

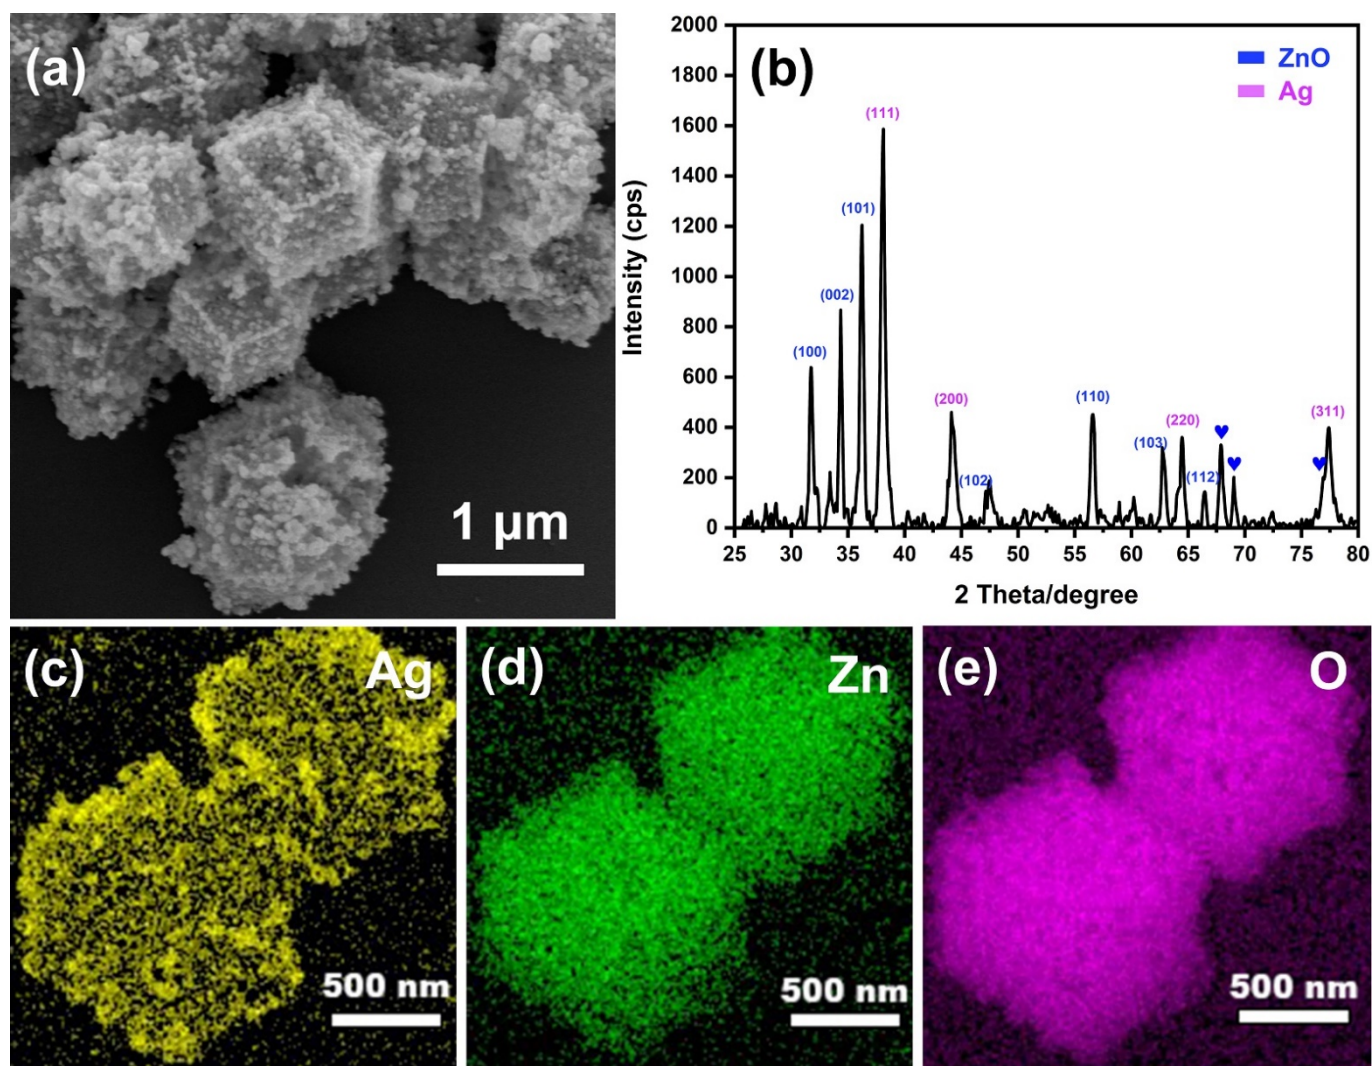

**Fig. S4.** (a) SEM images of ZnO/AgNPs, (b) XRD patterns of ZnO/AgNPs, (c-e) element mapping

of ZnO/AgNPs.

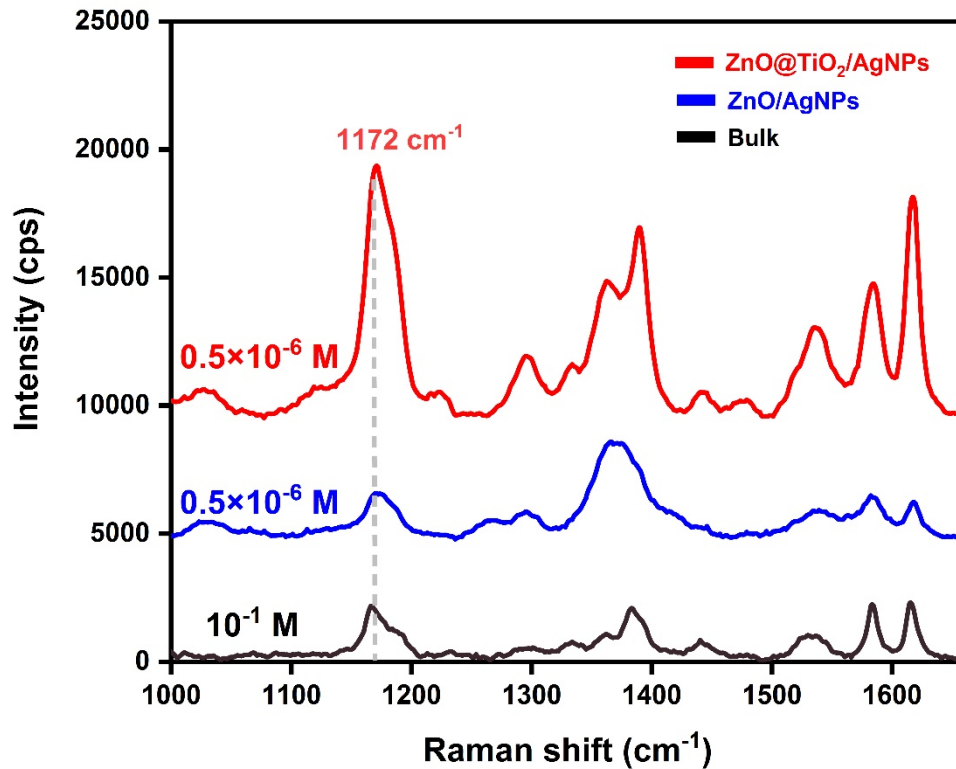

**Fig. S5.** SERS spectra obtained from bulk CV ( $10^{-1}$  M), ZnO/Ag substrate with CV ( $0.5 \times 10^{-6}$  M) and ZnO@TiO<sub>2</sub>/AgNPs substrate with CV ( $0.5 \times 10^{-6}$  M)

### Calculation of SERS enhancement factor (EF)

To quantify the enhancement contribution from ZnO/AgNPs and ZnO@TiO<sub>2</sub>/AgNPs substrates, we calculated their enhancement factor (EF) based on the following formula:

$$EF = (I_{\text{SERS}} / I_{\text{BULK}}) \times (N_{\text{BULK}} / N_{\text{SERS}})$$

where  $I_{\text{SERS}}$  and  $I_{\text{BULK}}$  represent the intensities of SERS and normal Raman scattering, whereas  $N_{\text{SERS}}$  and  $N_{\text{BULK}}$ , respectively, denote the numbers of corresponding CV molecules effectively excited by a laser beam. According to the above formula, the EF for the ZnO/AgNPs substrate is calculated to be  $0.86 \times 10^5$ . The EF is calculated to be  $7.68 \times 10^5$  for the ZnO@TiO<sub>2</sub>/AgNPs substrate.

$$N_{\text{BULK}} = (\text{Laser spot area} / \text{Diffusion area}) \times (N_A \times \text{Volume}_{\text{BULK}} \times \text{Concentration}_{\text{BULK}})$$

$$N_{\text{SERS}} = (\text{Laser spot area} / \text{Substrate area}) \times (N_A \times \text{Volume}_{\text{SERS}} \times \text{Concentration}_{\text{SERS}})$$

$$\text{Diffusion area} = \pi(d/2)^2 = 0.5027 \text{ cm}^2$$

$$\text{Substrate area} = 0.25 \text{ cm}^2$$

$$\text{Volume}_{\text{BULK}} = \text{Volume}_{\text{SERS}}$$

$$\text{Concentration}_{\text{BULK}} = 10^5 \times \text{Concentration}_{\text{SERS}}$$

$$N_{\text{BULK}} / N_{\text{SERS}} = (0.25 / 0.5027) \times 10^5 = 4.97 \times 10^4$$

$I$  = intensity of the  $1172 \text{ cm}^{-1}$  peak

$$I_{\text{BULK}} = 21196.96 \text{ a.u.}$$

$$I_{\text{SERS, ZnO/AgNPs}} = 36739.28 \text{ a.u.}$$

$$I_{\text{SERS, ZnO/AgNPs}} / I_{\text{BULK}} = 1.73$$

$$EF = (I_{\text{SERS}} / I_{\text{BULK}}) \times (N_{\text{BULK}} / N_{\text{SERS}}) = 0.86 \times 10^5$$

$$I_{\text{SERS, ZnO@TiO}_2/\text{AgNPs}} = 327581.56 \text{ a.u.}$$

$$I_{\text{SERS, ZnO@TiO}_2/\text{AgNPs}} / I_{\text{BULK}} = 15.45$$

$$EF = (I_{\text{SERS}} / I_{\text{BULK}}) \times (N_{\text{BULK}} / N_{\text{SERS}}) = 7.68 \times 10^5.$$
